# Supplementary material for: A non-invasive approach for H2S gas sensing under stimulated breathing conditions: a kag-MOF based gas sensor as a case study
Source: Royal Society of Chemistry journal article supplement (doi:10.1039/d4ma00417e), 2024-01-01
Supplement: d4ma00417e1.pdf [file d4ma00417e1.pdf]

## Supporting Information

# A Non-Invasive approach for H<sub>2</sub>S gas sensing under stimulated breathing conditions: kag-MOF based gas sensor as a case study

*Mostafa Zeama<sup>\*a</sup>, Jiangtao Jia<sup>a</sup>, Sheng Zhou<sup>a</sup>, Murilo Calil Faleiros<sup>b</sup>, Osama Shekhah<sup>a</sup>, Khaled N. Salama<sup>\*b</sup>, and Mohamed Eddaoudi<sup>\*b</sup>*

<sup>a</sup>Functional Materials Design, Discovery and Development research group (FMD3), Advanced Membranes & Porous Materials Center, Division of Physical Sciences and Engineering King Abdullah University of Science and Technology Thuwal 23955-6900 (Saudi Arabia).

<sup>b</sup>Sensors Lab, Electrical Engineering Program, Division of Computer, Electrical and Mathematical Sciences and Engineering King Abdullah University of Science and Technology Thuwal 23955-6900 (Saudi Arabia).

## Table of Contents

|            |                                        |    |
|------------|----------------------------------------|----|
| Section S1 | Materials and Methods                  | S3 |
| Section S2 | Synthetic Procedures                   | S4 |
| Section S3 | Material Characterization              | S5 |
| Section S4 | Sensing Studies                        | S6 |
| Section S5 | Density Functional Theory Calculations | S8 |

## Section S1: Materials and Methods

Powder X-ray diffraction (PXRD) measurements were carried out using a Bruker D8 ADVANCE X-ray diffractometer with Cu K<sub>α</sub> radiation ( $\lambda = 1.54178 \text{ \AA}$ ). TGA measurements were performed with a TA Instruments Q500 apparatus; the samples were heated under an air atmosphere (flow,  $25 \text{ cm}^3 \cdot \text{min}^{-1}$ ; heating rate,  $5 \text{ }^\circ\text{C}/\text{min}$ ). Low-pressure gas adsorption measurements were performed at relative pressures of up to 1 atm with a fully automated 3Flex high-resolution gas adsorption analyzer (Micromeritics). The bath temperature for the CO<sub>2</sub> adsorption measurements was controlled with an ethylene glycol/H<sub>2</sub>O recirculating bath. Field emission scanning electron microscope (FE-SEM) images were taken on a Quattro Dual Beam microscope at an acceleration voltage of 10 kV.

## Section S2: Synthetic Procedures

The kag-MOF was prepared according to our previous report with a modified procedure to get a nano-sheet morphology structure. In general, tetrazole-5-ethylester (328 mg, 2 mmol), and 20 mL of H<sub>2</sub>O were heated in a Teflon-lined autoclave to 120°C for 24 hr. After cooling to room temperature, a solution of Zn(NO<sub>3</sub>)<sub>3</sub>·6H<sub>2</sub>O (297 mg, 1 mmol) in 20 mL water is added to the previous solution. The mixture was shaken for several minutes and held for 24 hours to get a white milk-like solution. The particles were centrifuged and washed with water and methanol.

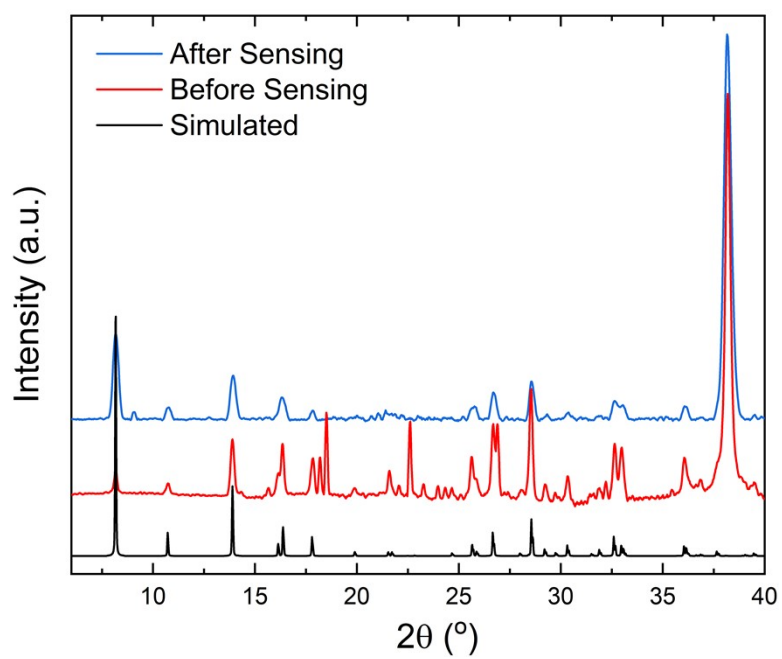

Figure S 1. Figure S 1. XRD analysis of the as synthesized *kag*-MOF before sensing (red), after sensing (blue) compared with the simulated (black).

### Section S3: Materials Characterization

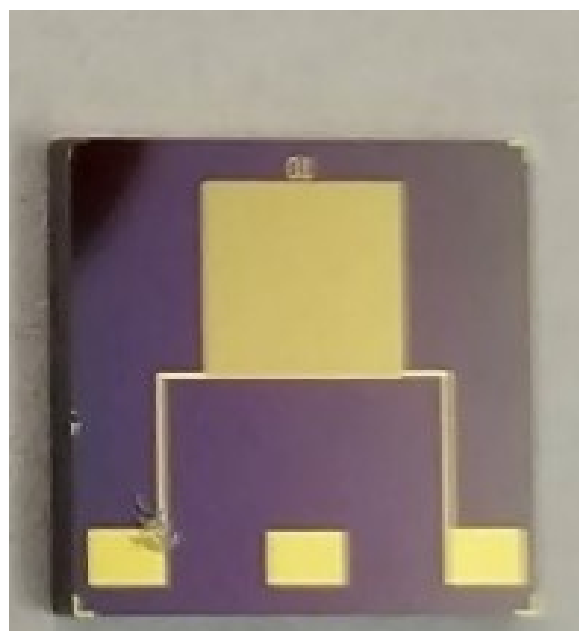

Figure S 2. An image for the IDE electrode used for the material deposition.

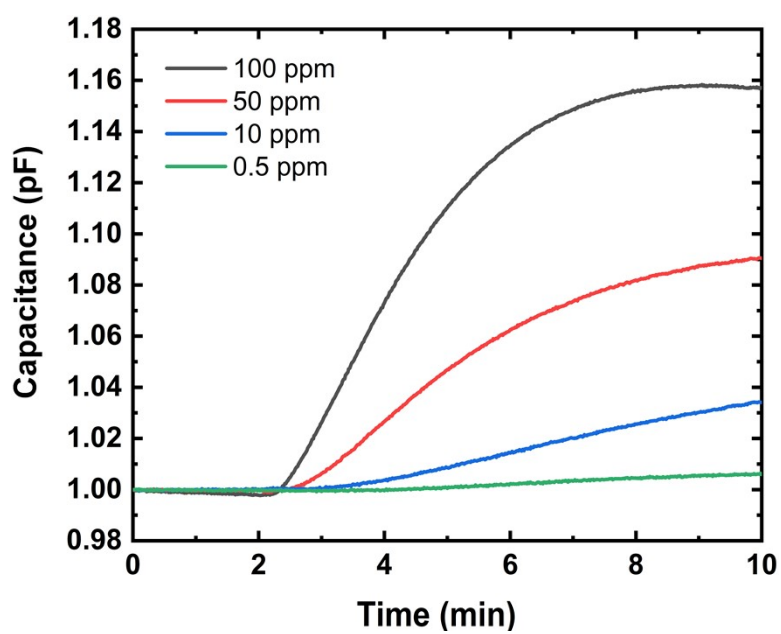

Figure S 3. Normalized capacitance of the *kag*-MOF IDE in the presence of  $H_2S$ .

#### Section S4: Sensing studies

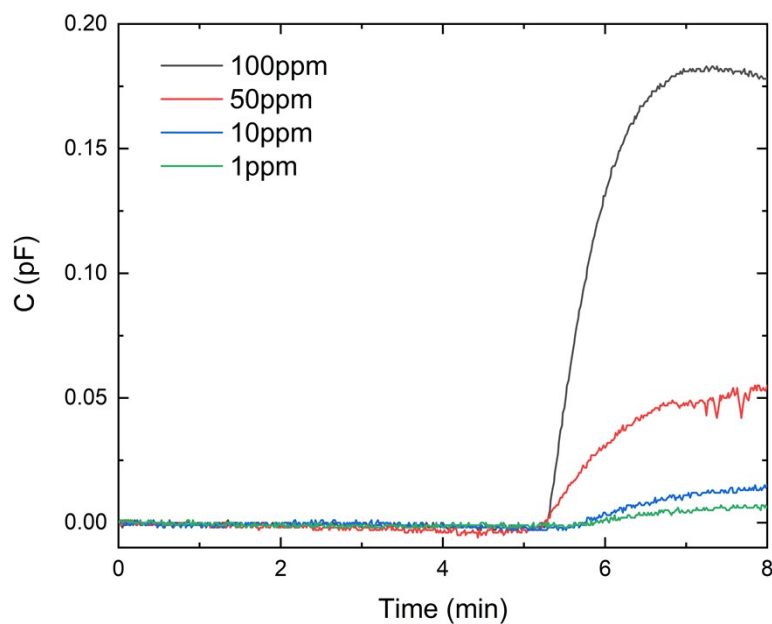

Figure S 4. Normalized capacitance of the *kag*-MOF IDE in the presence of  $NH_3$ .

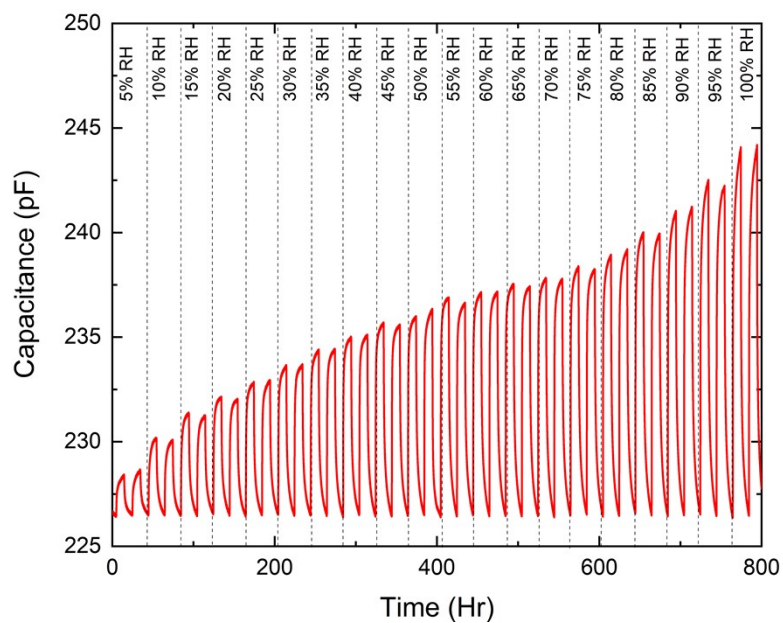

Figure S 6. The Capacitance of the *kag*-MOF IDE in the presence of different percentage of relative humidity

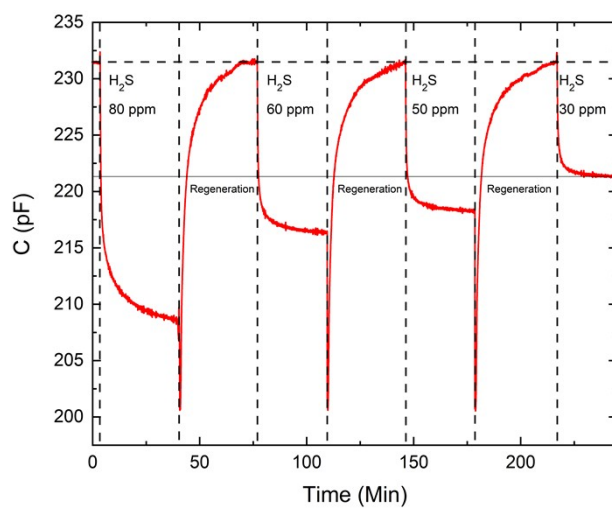

Figure S 5. The capacitance of the *kag*-MOF IDE electrode in 40 %RH at different concentration of H<sub>2</sub>S

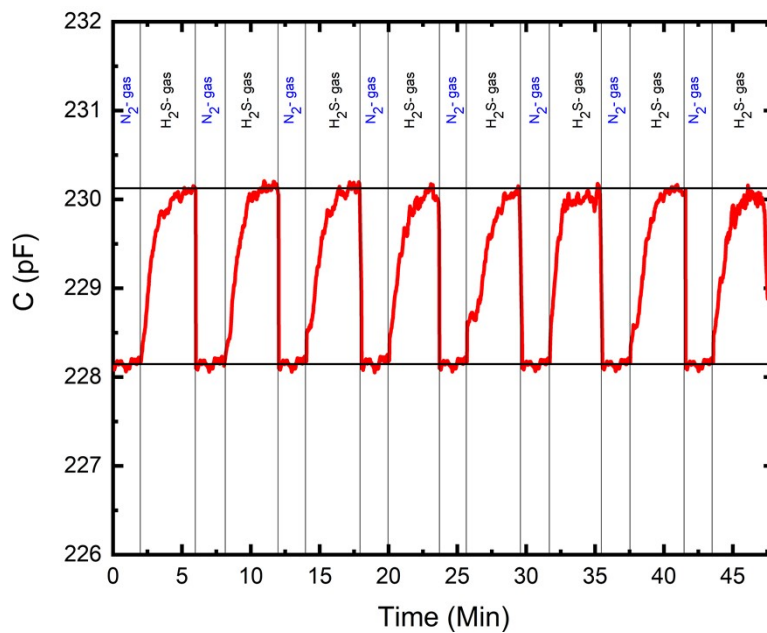

Figure S 8. The recyclability of the *kag*-MOF IDE electrode in the presence of  $H_2S$

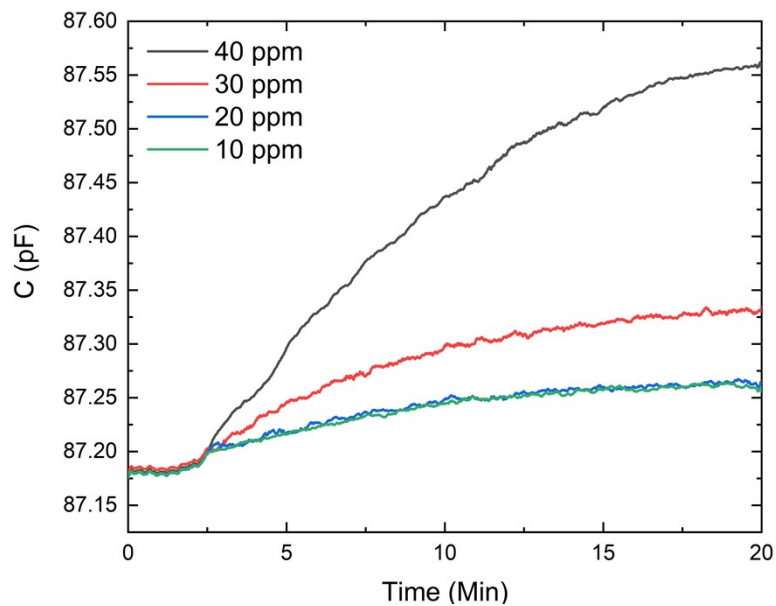

Figure S 7. The capacitance of the *kag*-MOF IDE in the presence of Human breath mixture and different concentration of  $H_2S$



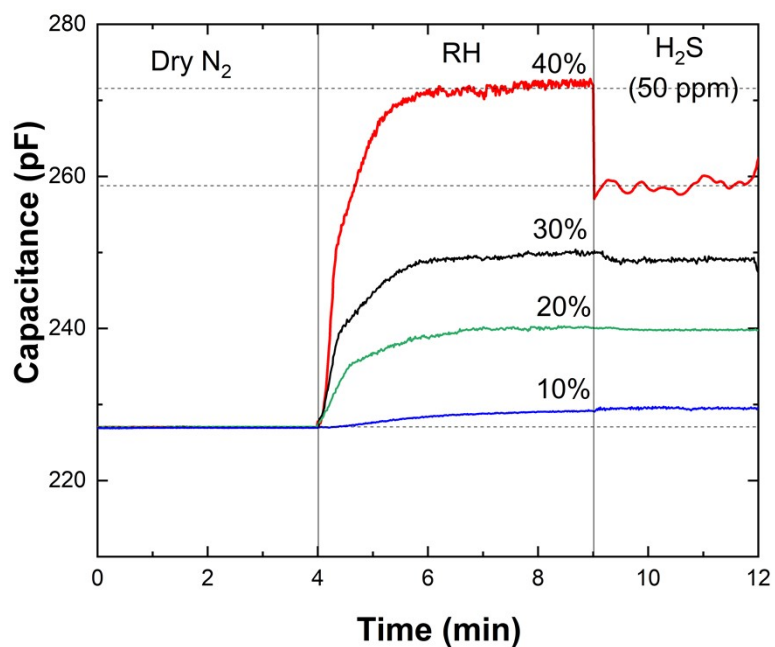

Figure S 9. The capacitance of the *kag*-MOF IDE electrode for 50 ppm H<sub>2</sub>S at different relative humidity

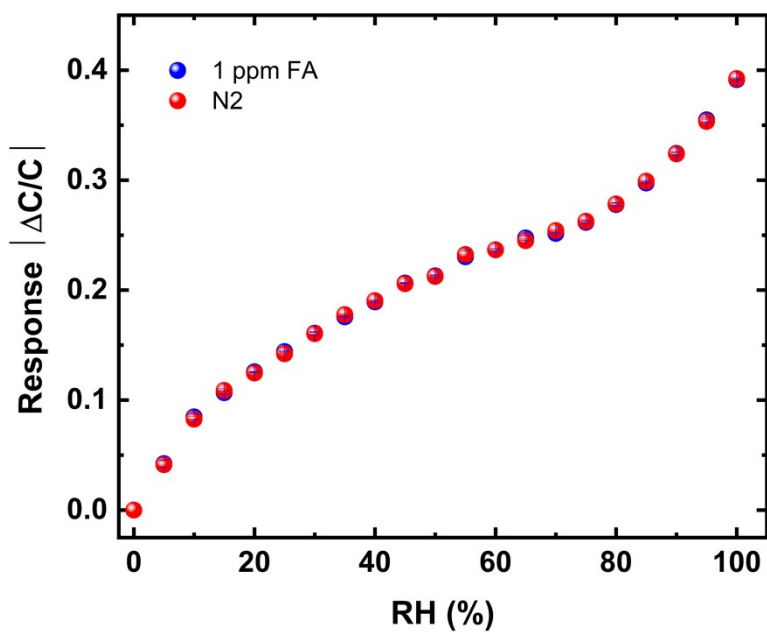

Figure S 10. the sensor response in different relative humidity condition in N<sub>2</sub> and 1 ppm FA

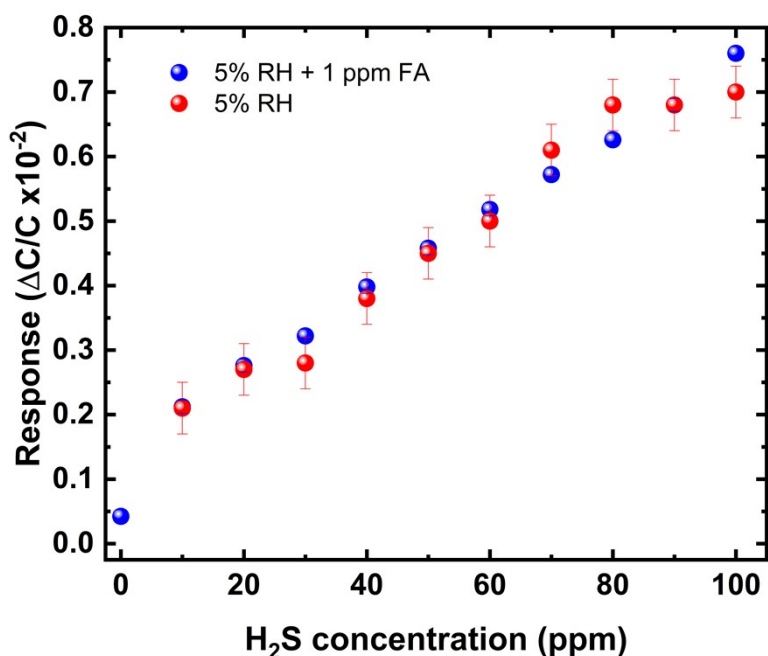

Figure S 11. the response of the sensor for different concentration of H<sub>2</sub>S at 5% RH with and without the presence of 1 ppm FA

## Section S5: Density Functional Theory Calculations

The structure of kag-MOF-1 was optimized using the Density Functional Theory method as implemented in Quantum Espresso (QS) code.[57] The measurement was performed using Quantum espresso 6.2.1 open source on Shaheen II (a Cray XC40 delivering over 7.2 Pflop/s of theoretical peak performance. With 5.536 Pflop/s of sustained LINPACK performance) with 32 task per node. We employed DFT with the generalized gradient approximation (GGA) functional in the parametrization of Perdew, Burke, and Ernzerhof (PBE) to account for exchange and correlation.[58] The projector-augmented wave method (PAW) was used for a basis set with a cutoff energy of 320 eV.[59, 60] The valence electronic configurations as given in the atomic potential files were 4s<sup>2</sup>3d<sup>10</sup> for Zn, 2s<sup>2</sup>2p<sup>4</sup> for O, 2s<sup>2</sup>2p<sup>3</sup> for N, 2s<sup>2</sup>2p<sup>2</sup> for C, and 1s<sup>1</sup> for H. Brillouin zone integration was performed using Blöchl's tetrahedron method, with a k-mesh generated by the Monkhorst–Pack scheme. As we are using a very large supercell, optimizations were carried out at gamma point. kag-MOF-1 was considered using a supercell of 992 atoms. Optimizations stopped when the maximum residual force of 0.01 eV per atom was reached. The electronic wave function criterion of convergence was 10<sup>-6</sup> eV. While modelling the H<sub>2</sub>S molecule, we have also used the implementation of the DFT-D<sub>2</sub> approach described by Grimme<sup>45</sup> to account for long-range dispersion forces. The isolated molecule was modelled in the center of the pores and near the metal sites.

The adsorption energy per molecule was calculated from the equation

$$E_{ads} = E_{complex} - (E_{MOF} + E_{mol})$$

where ( $E_{\text{complex}}$ ) is the total energy of the adsorbate-substrate system,  $E_{\text{MOF}}$  is the energy of the naked MOF cluster, and  $E_{\text{mol}}$  is the energy of the isolated adsorbate molecules. Within this definition, negative adsorption energy indicates an exothermic process.

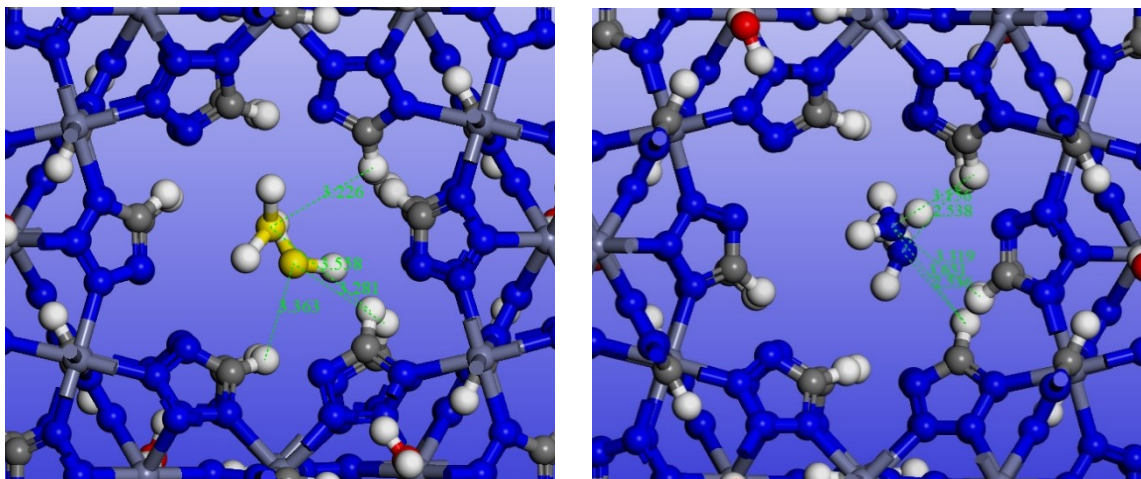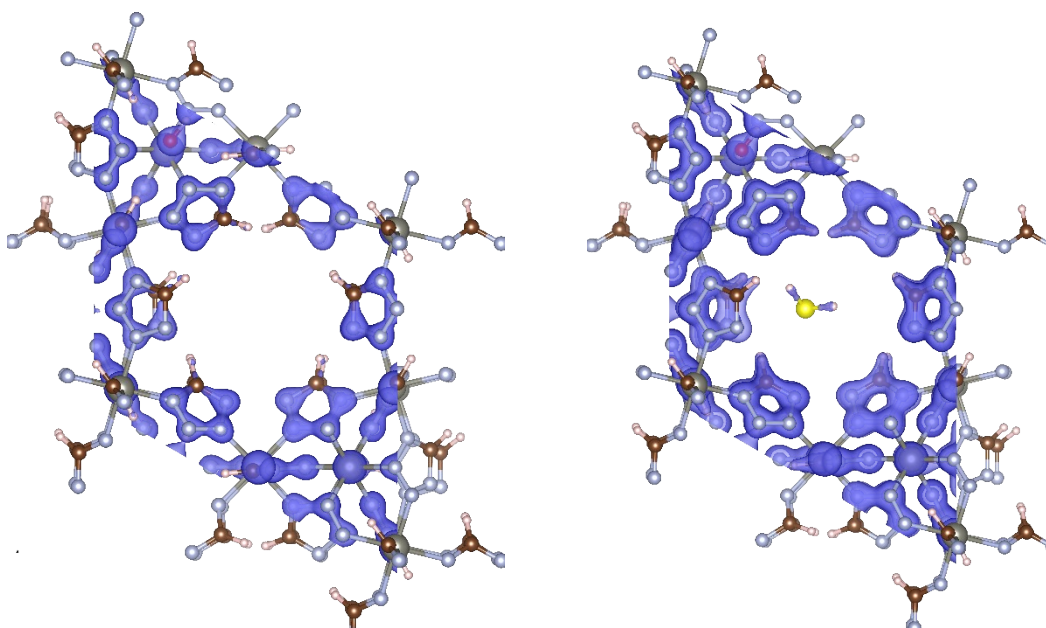

**Figure S6.** Positive Charge density difference before and after adding the  $\text{H}_2\text{S}$ . Isosurfaces drawn at resolution of 0.05 electron/bhor<sup>3</sup>. Color code is as following; brown (C) light-blue (N), white (H), gray (Zn), and red (O).
